# Supplementary material for: The impact of task context on predicting finger movements in a brain-machine interface
Source: eLife. 2023 Jun 7;12:e82598. doi: 10.7554/eLife.82598 (PMC10287157; doi:10.7554/eLife.82598)
Supplement: Supplementary file 2. — Results for Monkey N using the same sessions included in Figure 3 and Figure 4 and for Monkey W using the same sessions included in Figure 4. [file elife-82598-supp2.xlsx]

## Sheet: MSE
MSE		Monkey N												Monkey W
Training Context	Test Context	FCR	FDPid	FDPip	FDP	FCU	ECRB	EIP	EDC	Index Position	MRS Position	Index Velocity	MRS Velocity	Index Position	MRS Position	Index Velocity	MRS Velocity
Normal	Normal	0.61	0.67	0.62	0.74	0.74	0.44	0.47	0.47	0.61	0.5	0.75	0.73	0.81	0.84	0.76	0.9
Wrist	Wrist	0.62	0.71	0.65	0.77	0.74	0.53	0.57	0.57	0.69	0.5	0.74	0.73	0.85	0.84	0.78	0.92
Spring	Spring	0.57	0.61	0.62	0.64	0.5	0.5	0.49	0.44	0.53	0.46	0.79	0.67	0.65	0.89	0.75	0.81
Wrist + Spring	Wrist + Spring	0.53	0.67	0.62	0.76	0.57	0.6	0.61	0.54	0.6	0.49	0.78	0.72	0.82	0.81	0.82	0.86
Normal	Wrist	0.7	0.87	0.78	0.95	0.88	0.83	0.84	1	0.76	0.68	0.76	0.77	0.94	0.89	0.77	0.92
Normal	Spring	0.89	1.89	1.26	2.78	1.18	1.14	1.26	0.68	0.92	0.94	0.9	0.82	2.46	1.16	0.91	0.92
Normal	Wrist + Spring	1.09	2.96	2.35	3.63	2.06	3.61	2.82	1.6	1.45	0.92	0.88	1	1.67	1.09	1	0.9
