# Supplementary figures and images for: The impact of task context on predicting finger movements in a brain-machine interface
Source: eLife journal article supplement (doi:10.7554/elife.82598), 2023-06-07

## Change in Online Pushing Magnitude - Monkey N

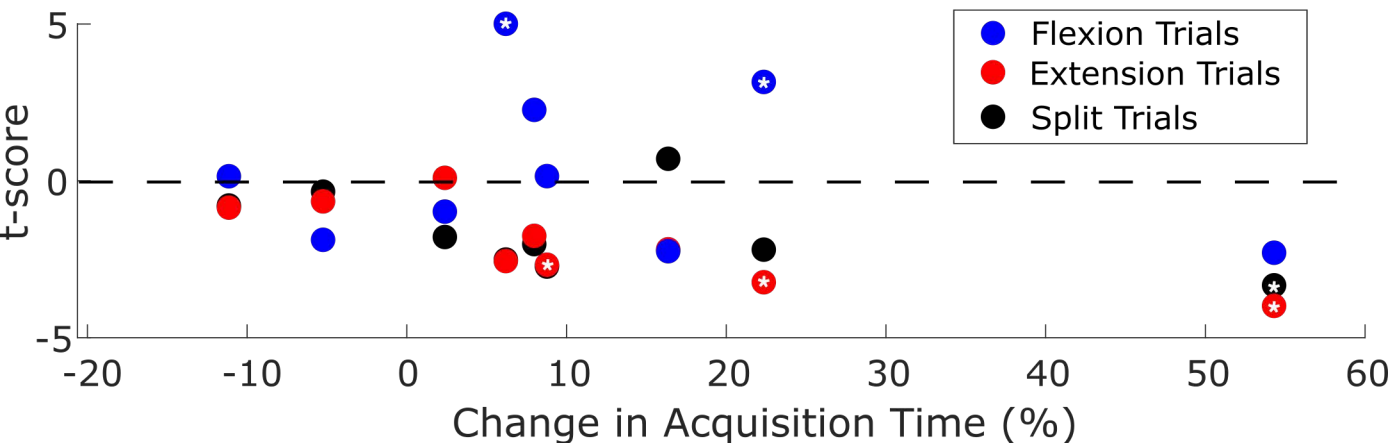

## Change in Online Pushing Magnitude - Monkey W

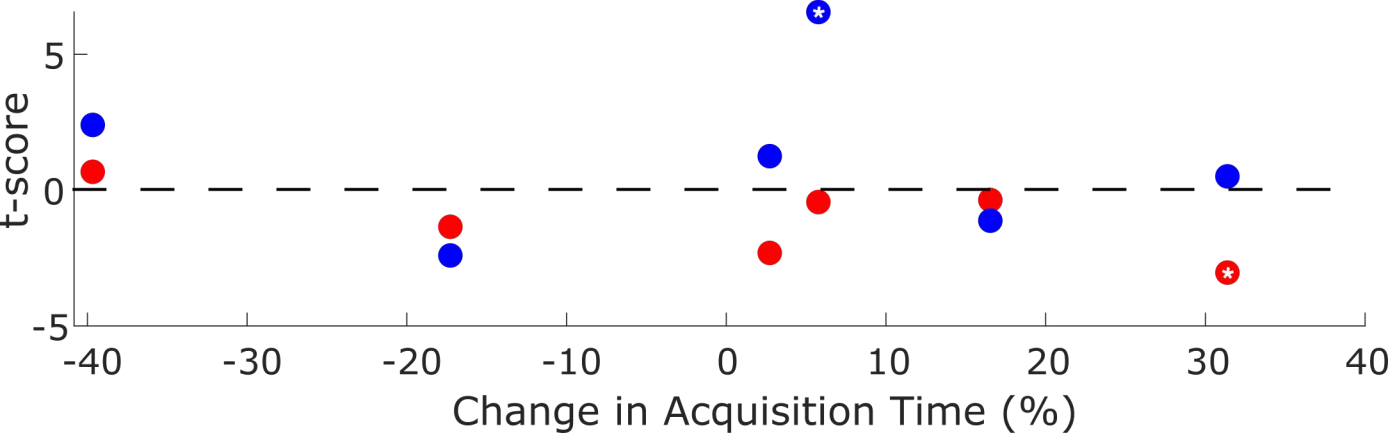

Supplement: supp [file elife-82598-supp-v1.zip]

# Correlation Between Hand and Online Decode

Correlation During Off-Context Trials

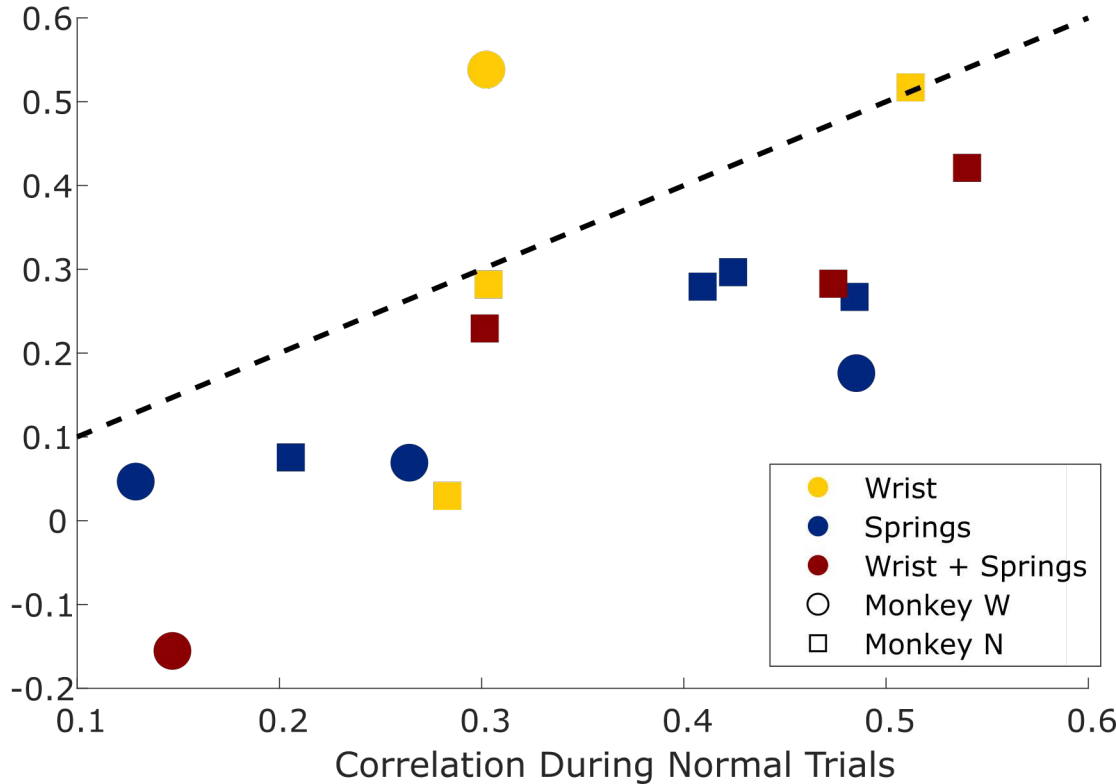

Supplement: supp [file elife-82598-supp-v1.zip]

## Monkey N - Online Model Comparison

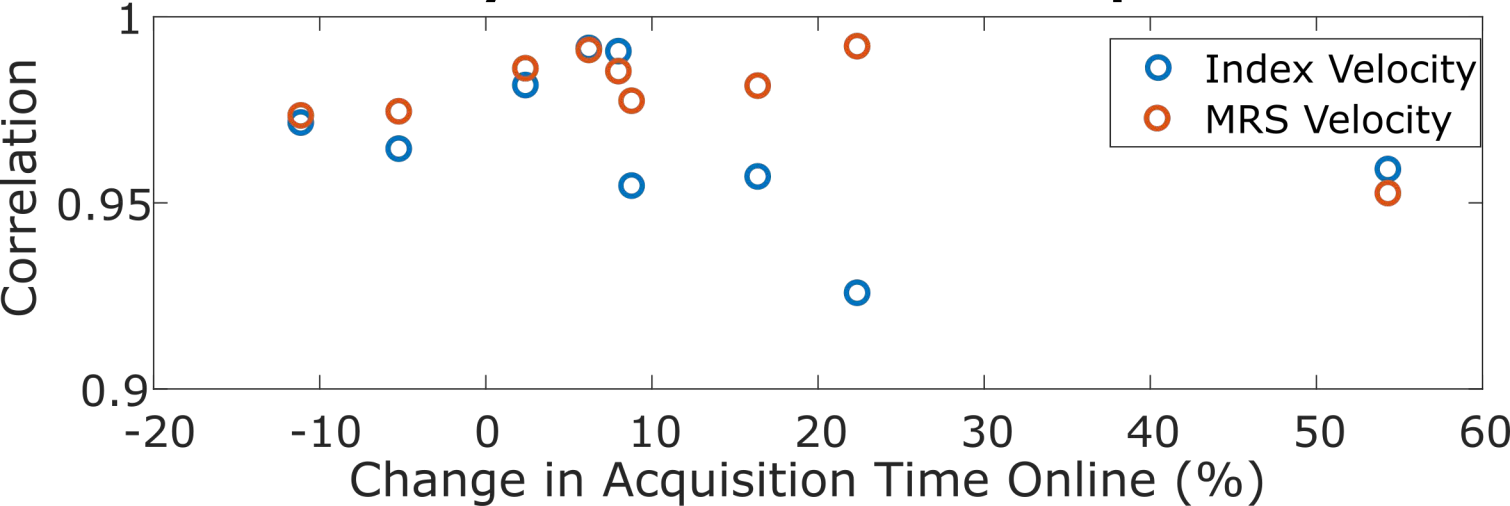

## Monkey W - Online Model Comparison

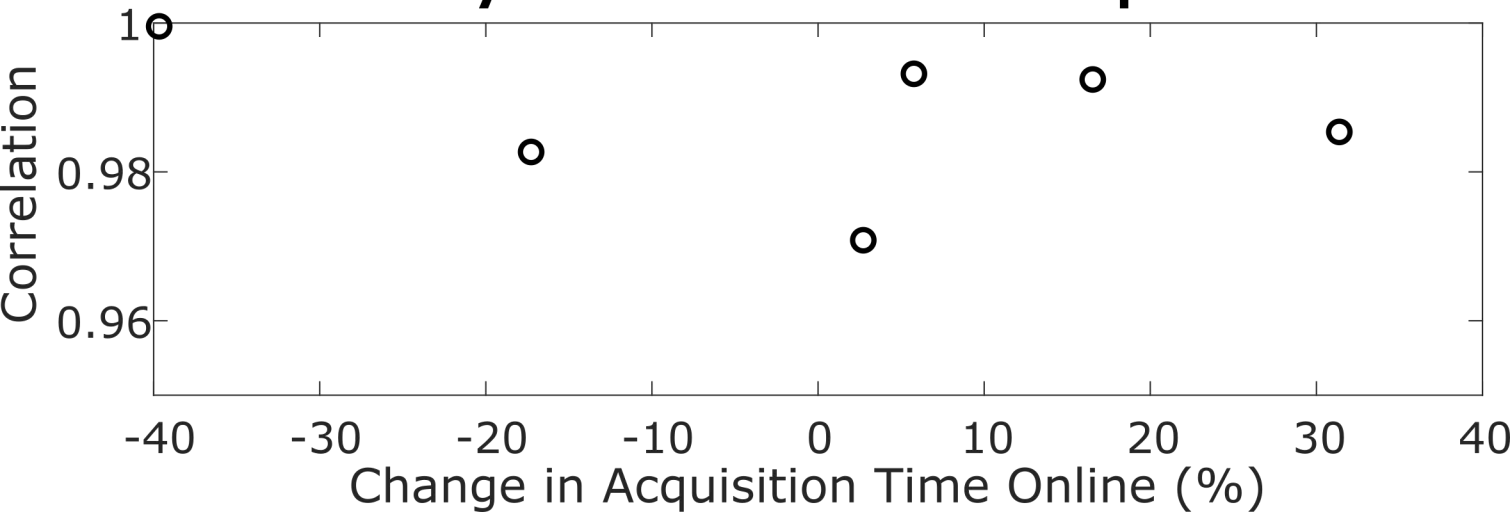

Supplement: supp [file elife-82598-supp-v1.zip]

### Change in Online Pushing Magnitude - Monkey N

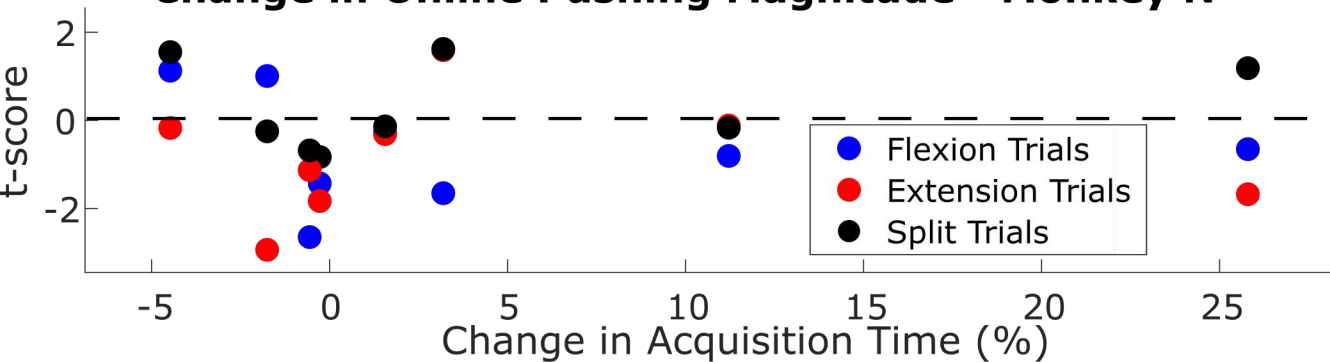

### Change in Online Pushing Magnitude - Monkey W

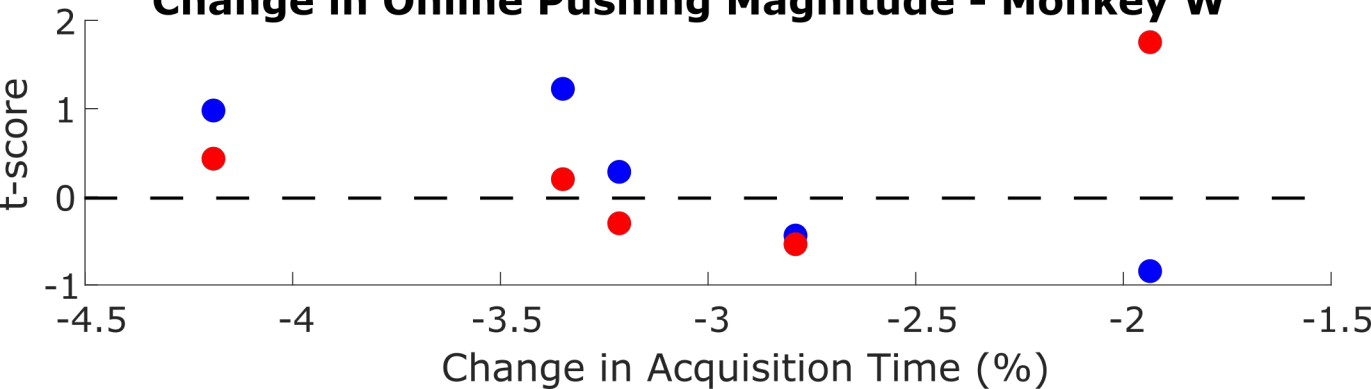

Supplement: supp [file elife-82598-supp-v1.zip]
